# Supplementary material
Source: ML conference proceedings conference paper supplement (https://openreview.net/forum?id=YsruHaTNYS)
Supplement: supplementary_material [file appendix.pdf › FedNano_Appendix/appendix.pdf]

## A FedNano: Pseudocode Overview

---

**Algorithm 1** *FedNano*. The  $K$  clients are indexed by  $k$ ;  $R$  is the number of communication rounds, and  $T$  is the number of local steps.

---

**Server Update:**

- 1: Randomly initialize  $\mathcal{A}_I^0$  and  $\mathcal{A}_T^0$  in *NanoAdapter*, and distribute to clients
- 2: **for**  $r = 1$  to  $R$  **do**
- 3:     **for**  $k = 1$  to  $K$  **in parallel do**
- 4:          $\theta_k^r \leftarrow \text{ClientUpdate}(\theta_{global}^{r-1}, D_k)$
- 5:         Compute FIM  $F_k$
- 6:     **end for**
- 7:      $\theta_{global}^r \leftarrow \text{ServerAgg}(\{\theta_k^r, F_k^r\})$  ▷ Eq. 1
- 8: **end for**

**Client Update:**

- 1:  $\theta_k^{r-1} \leftarrow \theta_{global}^{r-1}$
  - 2: **for** local step  $t = 1$  to  $T$  **do**
  - 3:     Sample  $\{(v_k, q_k, a_k)\}$  from  $D_k$
  - 4:      $\theta_k^{r(t)} \leftarrow \text{Optimization}(\theta_k^{r(t-1)}, v_k, q_k, a_k)$
  - 5: **end for**
  - 6: **return**  $\theta_k^r$
-
